# Supplementary material for: Virus Adaptation and Selection Following Challenge of Animals Vaccinated against Classical Swine Fever Virus
Source: PubMed Central journal article supplement (PMC6833067; doi:10.3390/v11100932), 2019-10-10
Supplement: viruses-11-00932-s001.pdf [file viruses-11-00932-s001.pdf]

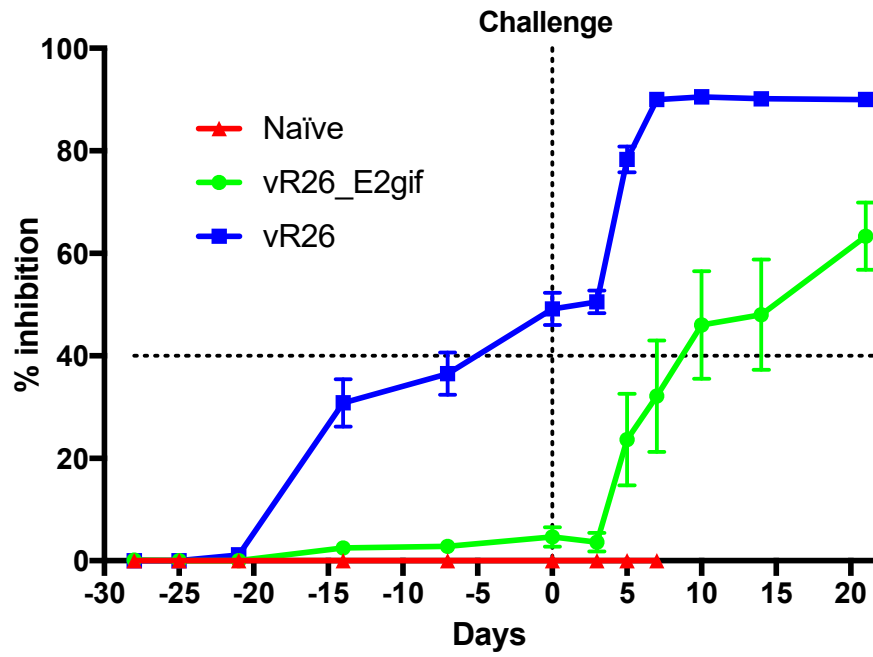

**Figure S1.** CSFV E2 specific antibodies detected by ELISA in naïve pigs or vaccinated pigs. Naïve pigs or pigs vaccinated with vR26, or vR26\_E2gif (as indicated) were challenged with the highly virulent CSFV strain “Koslov”. The graph shows the (mean  $\pm$  SEM values) of CSFV E2 specific antibodies detected by ELISA (PrioCHECK CSFV Ab 2.0, Prionics) with a positive cut-off at 40% inhibition shown as a horizontal dashed line.

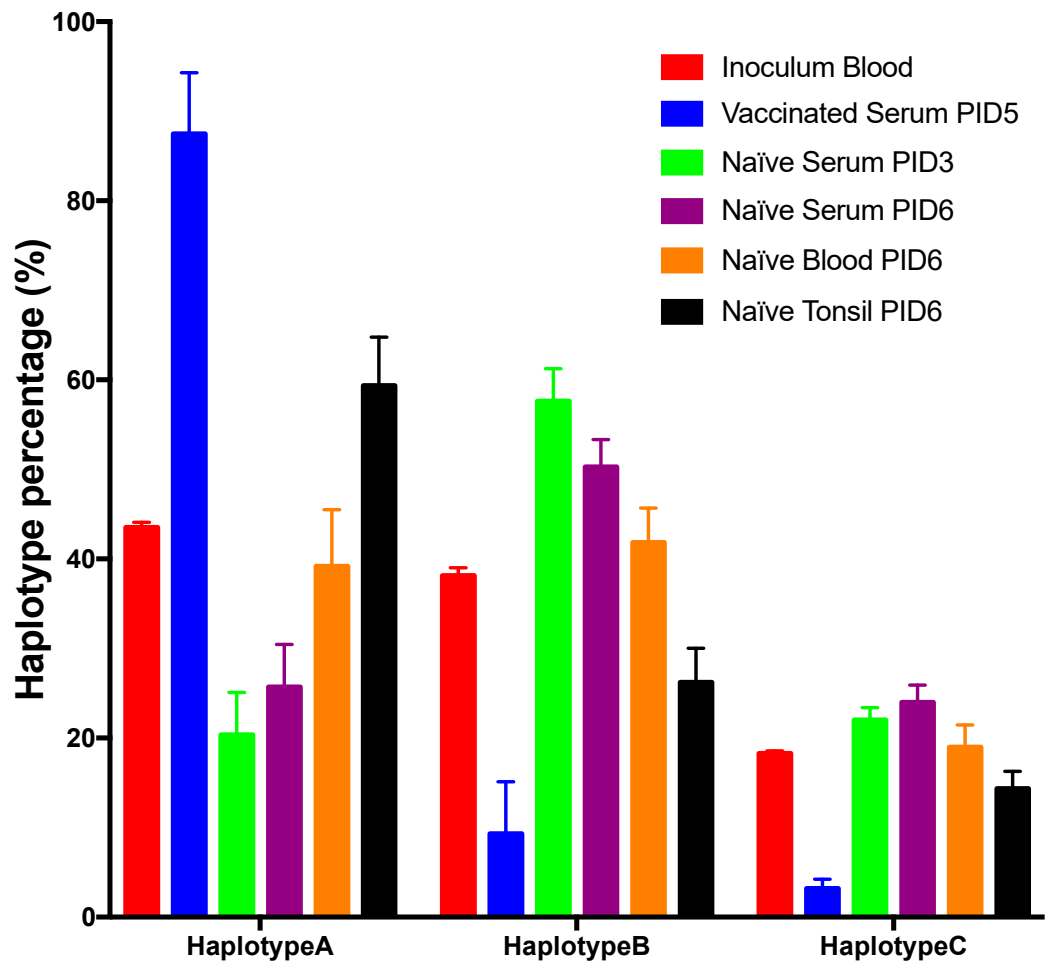

**Figure S2.** Haplotype distribution in virus populations of pooled samples analysed across the complete ORF. The graphs show the mean  $\pm$  SEM values. Bar diagram showing the percentage distribution of haplotype A (C2661T (aa S763L), G3205A, C4612G, T4750C, T9940C and A10669G), B (C2134T, T4150C, G5101A and G11374C) and C (Koslov consensus), respectively. Haplotype distribution was calculated for each sample, as the average of all SNPs constituting the haplotype A or B, and summed. The remaining percentage, subtracted from 100%, was inferred to constitute haplotype C.

**Table S1. RNA extraction and RT-PCR amplification from tonsils**

| RNA (Eluate)           | 1    | 2    | 3    | 4    | 5    |
|------------------------|------|------|------|------|------|
| RNA (ng/ $\mu$ l)      | 2719 | 1700 | 208  | 19   | 2    |
| ct                     | 19.9 | 20.8 | 19.7 | 21.2 | 22.5 |
| RT-PCR Band intensity* | (+)  | +    | +++  | +++  | ++   |

\*Band intensity was visualized on a 1% agarose gel and the number of + reflects the intensity.

**Table S2.** Samples sequenced, NGS platform and data analysis.

| Group      | Material sequenced | Pig no. <sup>1</sup> | Vaccine   | PID | RT-PCR <sup>2</sup> | NGS input | NGS platform |
|------------|--------------------|----------------------|-----------|-----|---------------------|-----------|--------------|
| Inoculum   | Blood              | NA                   | NA        | 0   | -                   | RNA       | FLX          |
|            | Blood              | NA                   | NA        | 0   | F                   | cDNA      | FLX          |
| Vaccinated | Serum              | p2                   | vR26E2gif | 5   | H                   | cDNA      | FLX          |
|            | Serum              | p3                   | vR26E2gif | 5   | H                   | cDNA      | PGM          |
|            | Serum              | p5                   | vR26E2gif | 5   | H                   | cDNA      | PGM          |
|            | Serum              | p15                  | vR26      | 5   | H                   | cDNA      | PGM          |
| Naïve      | Serum              | p19                  | NA        | 3   | H                   | cDNA      | PGM          |
|            | Serum              | p19                  | NA        | 6   | -                   | RNA       | FLX          |
|            | Blood              | p19                  | NA        | 6   | H                   | cDNA      | PGM          |
|            | Tonsil             | p19                  | NA        | 6   | F                   | cDNA      | PGM          |
|            | Serum              | p20                  | NA        | 3   | H                   | cDNA      | PGM          |
|            | Serum              | p20                  | NA        | 6   | -                   | RNA       | FLX          |
|            | Blood              | p20                  | NA        | 6   | H                   | cDNA      | PGM          |
|            | Tonsil             | p20                  | NA        | 6   | F                   | cDNA      | PGM          |
|            | Serum              | p21                  | NA        | 3   | H                   | cDNA      | FLX          |
|            | Serum              | p21                  | NA        | 6   | -                   | RNA       | FLX          |
|            | Blood              | p21                  | NA        | 6   | F                   | cDNA      | FLX          |
|            | Tonsil             | p21                  | NA        | 6   | F                   | cDNA      | PGM          |

<sup>1</sup>NA: Not applicable. <sup>2</sup>F: Full-length RT-PCR amplicon; H: 2 x half-length RT-PCR amplicons
